# Supplementary material for: Are high nurse workload/staffing ratios associated with decreased survival in critically ill patients? A cohort study
Source: Springer Nature journal article supplement (doi:10.1186/s13613-017-0269-2), 2017-05-02

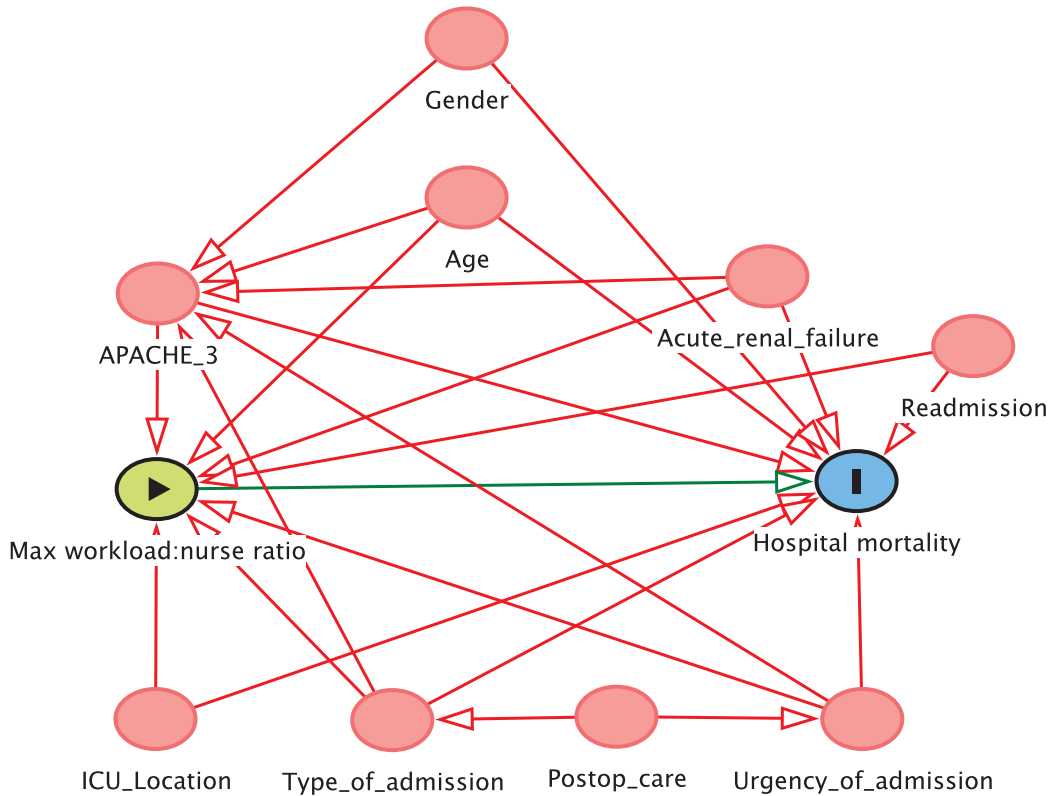

Supplement: MOESM1 [file 12260728]
